# Supplementary material for: Potential deprescribing indications for antidepressants between 2012 and 2019: repeated cross-sectional analysis in two Scottish health boards
Source: PubMed Central journal article supplement (PMC11389559; doi:10.1186/s12916-024-03584-9), 2024-09-11
Supplement: 12916_2024_3584_MOESM3_ESM.pdf [file 12916_2024_3584_MOESM3_ESM.pdf]

**Additional file 3:**

**Table S4:** Distribution of antidepressant groups among all antidepressant users

**Table S5:** Prevalence of each potential high-risk use indicator in 2012 and 2019

**Table S6:** Proportion of antidepressant users triggering indicators targeting specific adverse drug reaction risks (2012) and their distribution among age groups

**Table S7:** Proportion of antidepressant users triggering indicators targeting specific adverse drug reaction risks (2019) and their distribution among age groups

**Table S8:** Potential deprescribing indications (PDIs) (i.e., simultaneous long-term and potential high-risk use) in 2012 and 2019

**Table S9:** Sensitivity analysis for long-term and potential high-risk antidepressant use in 2012 and 2019

Potential deprescribing indications for antidepressants between 2012 and 2019: Repeated cross-sectional analysis in two Scottish health boards

Appendix

**Table S4:** Distribution of antidepressant groups among all antidepressant users

|                                          | <b>Second quarter<br/>2012</b> | <b>Second quarter<br/>2019</b>                                               | <b>Relative risk 2019 vs 2012 (95% CI)</b> |                  |
|------------------------------------------|--------------------------------|------------------------------------------------------------------------------|--------------------------------------------|------------------|
|                                          | No. of patients<br>(crude %)   | No. of patients<br>(crude %, <b>age-sex<br/>standardised<sup>a</sup> %</b> ) | Crude                                      | Age-sex stand.   |
| <b>Type of antidepressant drug class</b> |                                |                                                                              |                                            |                  |
| SSRI                                     | 39,791/73,600 (54.1)           | 51,244/92,601 (55.3; <b>54.9</b> )                                           | 1.02 (1.01-1.03)                           | 1.02 (1.01-1.03) |
| TCA                                      | 25,198/73,600 (34.2)           | 25,833/92,601 (27.9; <b>28.4</b> )                                           | 0.81 (0.80-0.83)                           | 0.83 (0.82-0.84) |
| SNRI                                     | 5,092/73,600 (6.9)             | 9,470/92,601 (10.2; <b>10.3</b> )                                            | 1.48 (1.43-1.53)                           | 1.49 (1.44-1.54) |
| NASSA                                    | 6,865/73,600 (9.3)             | 13,279/92,601 (14.3; <b>14.3</b> )                                           | 1.54 (1.50-1.58)                           | 1.53 (1.49-1.58) |
| MAOI                                     | 160/73,600 (0.2)               | 128/92,601 (0.1; <b>0.1</b> )                                                | 0.64 (0.50-0.80)                           | 0.64 (0.50-0.82) |
| Others                                   | 2,586/73,600 (3.5)             | 2,700/92,601 (2.9; <b>3.0</b> )                                              | 0.83 (0.79-0.88)                           | 0.84 (0.79-0.89) |

<sup>a</sup>direct age-sex standardisation to the 2012 population

## Appendix

**Table S5:** Prevalence of each potential high-risk use indicator in 2012 and 2019

| Indicators                                                                                                                                                                                                                   | 2012            |                      | 2019            |                      |
|------------------------------------------------------------------------------------------------------------------------------------------------------------------------------------------------------------------------------|-----------------|----------------------|-----------------|----------------------|
|                                                                                                                                                                                                                              | No. of patients | Prevalence (N/D) (%) | No. of patients | Prevalence (N/D) (%) |
| <b>Cardiovascular adverse effects</b>                                                                                                                                                                                        |                 |                      |                 |                      |
| C1. Dispensed SNRI or TCA (dispensed strength $\geq 50$ mg) or tranylcypromine (D)<br>- and the patient has a previous hospital admission for heart failure (N)                                                              | 10657<br>31     | 0.3                  | 13946<br>51     | 0.4                  |
| C2. Dispensed TCA (dispensed strength $\geq 50$ mg) (D)<br>- and the patient has a previous hospital admission for ischemic heart disease (N)                                                                                | 5690<br>81      | 1.4                  | 4755<br>45      | 0.9                  |
| C3. Dispensed $>20$ mg citalopram or $>10$ mg escitalopram (D)<br>- and the patient is aged $\geq 65$ years (risk of QTc prolongation) (N)                                                                                   | 4338<br>487     | 11.2                 | 3017<br>373     | 12.4                 |
| C4. Dispensed citalopram or escitalopram (D)<br>- and the patient has a previous hospital admission for heart failure, myocardial hypertrophy, bradycardia (atrioventricular block) or myocardial infarction (N)             | 21599<br>148    | 0.7                  | 16690<br>76     | 0.5                  |
| C5. Dispensed citalopram, escitalopram, TCA (dispensed strength $\geq 50$ mg), maprotiline, mianserin (D)<br>- and the patient is also dispensed $\geq 1$ further drug with any risk of TdP (N)                              | 27026<br>14970  | 55.4                 | 21333<br>11336  | 53.1                 |
| C6. Dispensed fluoxetine, paroxetine or bupropion (D)<br>- and the patient is also dispensed metoprolol or propranolol (risk of bradycardia) (N)                                                                             | 14132<br>606    | 4.3                  | 16144<br>1083   | 6.7                  |
| C7. Dispensed SNRI or TCA (dispensed strength $\geq 50$ mg) or bupropion or tranylcypromine (D)<br>- and the patient is also dispensed $\geq 3$ antihypertensive drugs (N)                                                   | 10710<br>883    | 8.2                  | 13959<br>864    | 6.2                  |
| <b>Total: patients at risk of cardiovascular adverse effects (D)</b>                                                                                                                                                         | 45412           | 35.3                 | 46089           | 28.2                 |
| <b>Total: patient triggering cardiovascular adverse effects (N)</b>                                                                                                                                                          | 16047           |                      | 13019           |                      |
| <b>Orthostatic hypotension (OH)/dizziness</b>                                                                                                                                                                                |                 |                      |                 |                      |
| OH1. Dispensed TCA (dispensed strength $\geq 50$ mg) or trazodone or tranylcypromine and aged $\geq 65$ years (D)<br>- and the patient is also dispensed $\geq 1$ further drug with known blood pressure lowering effect (N) | 2721<br>1909    | 70.2                 | 2639<br>1749    | 66.3                 |
| OH2. Dispensed SSRI or SNRI or mirtazapine and aged $\geq 65$ years (D)<br>- and the patient is also dispensed $\geq 2$ further drugs with blood pressure lowering effect (N)                                                | 12560<br>5319   | 42.3                 | 17516<br>6380   | 36.4                 |
| <b>Total: patients at risk of OH/dizziness (D)</b>                                                                                                                                                                           | 14954           | 47.5                 | 19690           | 40.4                 |
| <b>Total: patient triggering OH/dizziness (N)</b>                                                                                                                                                                            | 7098            |                      | 7949            |                      |
| <b>Falls and fall-related injuries</b>                                                                                                                                                                                       |                 |                      |                 |                      |
| F1. Dispensed SSRI, SNRI, TCA (dispensed strength $\geq 50$ mg), mirtazapine or trazodone and aged $\geq 65$ years (D)<br>- and the patient is also dispensed $\geq 1$ further fall-risk-increasing drug (N)                 | 14949<br>11673  | 78.1                 | 19685<br>14026  | 71.3                 |
| F2. Dispensed SSRI, SNRI, TCA (dispensed strength $\geq 50$ mg), mirtazapine or trazodone and aged $\geq 65$ years (D)<br>- and the patient has a previous hospital admission for falls (N)                                  | 14949<br>818    | 5.5                  | 19685<br>1197   | 6.1                  |
| F3. Dispensed SSRI, SNRI, TCA (dispensed strength $\geq 50$ mg), mirtazapine or trazodone and aged $\geq 65$ years (D)                                                                                                       | 14949           | 7.9                  | 19685           | 8.8                  |

Potential deprescribing indications for antidepressants between 2012 and 2019: Repeated cross-sectional analysis in two Scottish health boards

Appendix

|                                                                                                                                                                      |       |      |       |      |
|----------------------------------------------------------------------------------------------------------------------------------------------------------------------|-------|------|-------|------|
| - and the patient has a previous hospital admission for dementia or was recently dispensed antidepressants (N)                                                       | 1179  |      | 1729  |      |
| F4. Dispensed SSRI, SNRI, TCA (dispensed strength $\geq 50$ mg), mirtazapine or trazodone, aged $\geq 65$ years and has a previous hospital admission for stroke (D) | 318   | 81.4 | 388   | 76.5 |
| - and the patient is also dispensed $\geq 1$ further fall-risk-increasing drug (N)                                                                                   | 259   |      | 297   |      |
| <b>Total: patients at risk of falls (D)</b>                                                                                                                          | 14949 | 80.8 | 19685 | 75.3 |
| <b>Total: patient triggering the risk of falls (N)</b>                                                                                                               | 12075 |      | 14823 |      |
| <b>Cognitive decline</b>                                                                                                                                             |       |      |       |      |
| CD1. Dispensed anticholinergic antidepressant TCA (dispensed strength $\geq 50$ mg), maprotiline or paroxetine (D)                                                   | 8125  | 1.1  | 6414  | 1.1  |
| - and the patient has a previous hospital admission for dementia or cognitive impairment or was recently dispensed antidepressants (N)                               | 89    |      | 69    |      |
| <b>Delirium</b>                                                                                                                                                      |       |      |       |      |
| D1. Dispensed anticholinergic antidepressant TCA (dispensed strength $\geq 50$ mg), maprotiline or paroxetine and has a previous hospital admission for delirium (D) | 12    | 58.3 | 22    | 68.2 |
| - and the patient is also dispensed $\geq 1$ further drug known to induce delirium (N)                                                                               | 7     |      | 15    |      |
| D2. Dispensed anticholinergic antidepressant TCA (dispensed strength $\geq 50$ mg), maprotiline or paroxetine and aged $\geq 65$ years (D)                           | 2697  | 35.8 | 2316  | 33.6 |
| - and the patient is also dispensed $\geq 2$ further drugs known to induce delirium (N)                                                                              | 965   |      | 778   |      |
| <b>Total: patients at risk of delirium (D)</b>                                                                                                                       | 2700  | 35.9 | 2319  | 33.8 |
| <b>Total: patient triggering the risk of delirium (N)</b>                                                                                                            | 969   |      | 783   |      |
| <b>Serotonin syndrome</b>                                                                                                                                            |       |      |       |      |
| S1. Dispensed tranylcypromine (D)                                                                                                                                    | 10    | 30.0 | 8     | 25.0 |
| - and the patient is also dispensed $\geq 1$ further serotonergic drug (N)                                                                                           | 3     |      | 2     |      |
| S2. Dispensed SSRI or SNRI or TCA (dispensed strength $\geq 50$ mg) (D)                                                                                              | 49630 | 4.0  | 64071 | 4.0  |
| - and the patient is also dispensed $\geq 2$ further serotonergic drugs other than tranylcypromine (N)                                                               | 1975  |      | 2590  |      |
| <b>Total: patients at risk of serotonin syndrome (D)</b>                                                                                                             | 49639 | 4.0  | 64079 | 4.0  |
| <b>Total: patient triggering the risk of serotonin syndrome (N)</b>                                                                                                  | 1978  |      | 2592  |      |
| <b>Gastrointestinal bleeding</b>                                                                                                                                     |       |      |       |      |
| G1. Dispensed SSRI or SNRI and aged $\geq 65$ years (D)                                                                                                              | 10567 | 21.9 | 13551 | 14.9 |
| - and the patient is also dispensed a single of the following without GI-protection: antiplatelet, anticoagulant, NSAID (N)                                          | 2311  |      | 2017  |      |
| G2. Dispensed SSRI or SNRI and aged $\geq 65$ years (D)                                                                                                              | 10567 | 6.6  | 13551 | 2.5  |
| - and the patient is also dispensed $\geq 2$ of the following: antiplatelet, anticoagulant, NSAID (regardless of GI-protection) (N)                                  | 698   |      | 344   |      |
| G3. Dispensed SSRI or SNRI and has a previous hospital admission for GI-bleeding or peptic ulcer disease (D)                                                         | 195   | 30.8 | 212   | 36.3 |

Potential deprescribing indications for antidepressants between 2012 and 2019: Repeated cross-sectional analysis in two Scottish health boards

Appendix

|                                                                                                                                             |       |      |       |      |
|---------------------------------------------------------------------------------------------------------------------------------------------|-------|------|-------|------|
| - and the patient is also dispensed $\geq 1$ of the following: antiplatelet, anticoagulant, NSAID (regardless of GI-protection) (N)         | 60    |      | 77    |      |
| <b>Total: patients at risk of gastrointestinal bleeding (D)</b>                                                                             | 10665 | 25.7 | 13668 | 17.0 |
| <b>Total: patient triggering the risk of gastrointestinal bleeding (N)</b>                                                                  | 2746  |      | 2330  |      |
| <b>Bleeding</b>                                                                                                                             |       |      |       |      |
| B1. Dispensed SSRI and has a previous hospital admission of a bleeding event (D)                                                            | 165   | 39.4 | 218   | 32.1 |
| - and the patient is also dispensed $\geq 1$ of the following: anticoagulant or antiplatelet (N)                                            | 65    |      | 70    |      |
| B2. Dispensed SSRI and has a previous hospital admission for hemorrhagic stroke or for dementia (D)                                         | 192   | 51.0 | 139   | 36.0 |
| - and the patient is also dispensed $\geq 1$ of the following: anticoagulant or antiplatelet (N)                                            | 98    |      | 50    |      |
| <b>Total: patients at risk of bleeding (D)</b>                                                                                              | 320   | 48.4 | 317   | 35.0 |
| <b>Total: patient triggering the risk of bleeding (N)</b>                                                                                   | 155   |      | 111   |      |
| <b>Constipation</b>                                                                                                                         |       |      |       |      |
| CO1. Dispensed anticholinergic antidepressant TCA (dispensed strength $\geq 50$ mg), maprotiline or paroxetine and aged $\geq 65$ years (D) | 2697  | 19.1 | 2316  | 21.3 |
| - and the patient is also dispensed $\geq 2$ further drugs known to have constipating effects (N)                                           | 514   |      | 494   |      |
| <b>Hyponatremia</b>                                                                                                                         |       |      |       |      |
| H1. Dispensed SSRI or SNRI and aged $\geq 65$ years (D)                                                                                     | 10567 | 25.5 | 13551 | 22.2 |
| - and the patient is also dispensed $\geq 2$ further drugs known to cause hyponatremia (N)                                                  | 2699  |      | 3014  |      |
| <b>Voiding disorders</b>                                                                                                                    |       |      |       |      |
| VD1. Dispensed anticholinergic antidepressant TCA (dispensed strength $\geq 50$ mg), maprotiline or paroxetine (D)                          | 8125  | 3.0  | 6414  | 3.5  |
| - and the patient is also dispensed $\geq 1$ drug for benign prostatic hyperplasia or urinary retention (N)                                 | 241   |      | 226   |      |
| <b>Sleep disturbances/agitation</b>                                                                                                         |       |      |       |      |
| I. Dispensed SSRI or SNRI or MAOI or bupropion (D)                                                                                          | 44814 | 17.8 | 60388 | 16.3 |
| - and the patient is also dispensed $\geq 1$ hypnotic (N)                                                                                   | 7997  |      | 9842  |      |
| <b>Sexual dysfunction</b>                                                                                                                   |       |      |       |      |
| SD1. Dispensed SSRI or SNRI (D)                                                                                                             | 44612 | 0.9  | 60252 | 1.2  |
| - and the patient is also dispensed $\geq 1$ drug for erectile dysfunction (N)                                                              | 404   |      | 728   |      |

## Appendix

**Table S6:** Proportion of antidepressant users triggering indicators targeting specific adverse drug reaction risks (2012) and their distribution among age groups

| Adverse drug reaction risks targeted by indicators | No. of patients among each age-group triggering indicators |         |         |          | Total no. of patients (%) | Total no. of patients (%) | Total number of patients among all antidepressant users (%) |
|----------------------------------------------------|------------------------------------------------------------|---------|---------|----------|---------------------------|---------------------------|-------------------------------------------------------------|
|                                                    | 18 - 39                                                    | 40 - 64 | 65 - 79 | 80 - 100 | 18 - 64                   | 65 - 100                  |                                                             |
|                                                    | Falls/Fractures                                            | 0       | 0       | 8,078    | 3,997                     | 0/51,144 (0.0)            |                                                             |
| Orthostatic hypotension/dizziness                  | 0                                                          | 0       | 4,843   | 2,255    | 0/51,144 (0.0)            | 7,098/22,456 (31.6)       | 7,098/73,600 <b>(9.6)</b>                                   |
| Cardiovascular adverse effects                     | 2,090                                                      | 7,839   | 4,166   | 1,952    | 9,929/51,144 (19.4)       | 6,118/22,456 (27.2)       | 16,047/73,600 <b>(21.8)</b>                                 |
| Hyponatremia                                       | 0                                                          | 0       | 1,784   | 915      | 0/51,144 (0.0)            | 2,699/22,456 (12.0)       | 2,699/73,600 <b>(3.7)</b>                                   |
| Insomnia                                           | 1,336                                                      | 4,248   | 1,670   | 743      | 5,584/51,144 (10.9)       | 2,413/22,456 (10.7)       | 7,997/73,600 <b>(10.9)</b>                                  |
| Any bleeding                                       | 2                                                          | 33      | 1,868   | 929      | 35/51,144 (0.1)           | 2,797/22,456 (12.5)       | 2,832/73,600 <b>(3.8)</b>                                   |
| Delirium                                           | 0                                                          | 2       | 776     | 191      | 2/51,144 (0.0)            | 967/22,456 (4.3)          | 969/73,600 <b>(1.3)</b>                                     |
| Constipation                                       | 0                                                          | 0       | 429     | 85       | 0/51,144 (0.0)            | 514/22,456 (2.3)          | 514/73,600 <b>(0.7)</b>                                     |
| Serotonin syndrome                                 | 397                                                        | 1,189   | 312     | 80       | 1,586/51,144 (3.1)        | 392/22,456 (1.7)          | 1,978/73,600 <b>(2.7)</b>                                   |
| Voiding disorders                                  | 1                                                          | 71      | 130     | 39       | 72/51,144 (0.1)           | 169/22,456 (0.8)          | 241/73,600 <b>(0.3)</b>                                     |
| Sexual dysfunction                                 | 22                                                         | 322     | 55      | 5        | 344/51,144 (0.7)          | 60/22,456 (0.3)           | 404/73,600 <b>(0.5)</b>                                     |
| Cognitive decline                                  | 0                                                          | 15      | 41      | 33       | 15/51,144 (0.0)           | 74/22,456 (0.3)           | 89/73,600 <b>(0.1)</b>                                      |

## Appendix

**Table S7:** Proportion of antidepressant users triggering indicators targeting specific adverse drug reaction risks (2019) and their distribution among age groups

| Adverse drug reaction risks targeted by indicators | No. of patients among each age-group triggering indicators |         |         |          | Total no. of patients (%) | Total no. of patients (%) | Total number of patients among all antidepressant users (%) |
|----------------------------------------------------|------------------------------------------------------------|---------|---------|----------|---------------------------|---------------------------|-------------------------------------------------------------|
|                                                    | 18 - 39                                                    | 40 - 64 | 65 - 79 | 80 - 100 | 18 - 64                   | 65 - 100                  |                                                             |
|                                                    | Falls/Fractures                                            | 0       | 0       | 10,069   | 4,754                     | 0/65,324 (0.0)            |                                                             |
| Orthostatic hypotension/dizziness                  | 0                                                          | 0       | 5,510   | 2,439    | 0/65,324 (0.0)            | 7,949/27,277 (29.1)       | 7,949/92,601 <b>(8.6)</b>                                   |
| Cardiovascular adverse effects                     | 1,772                                                      | 6,455   | 3,519   | 1,273    | 8,227/65,324 (12.6)       | 4,792/27,277 (17.6)       | 13,019/92,601 <b>(14.1)</b>                                 |
| Hyponatremia                                       | 0                                                          | 0       | 2,136   | 878      | 0/65,324 (0.0)            | 3,014/27,277 (11.0)       | 3,014/92,601 <b>(3.3)</b>                                   |
| Insomnia                                           | 1,951                                                      | 5,341   | 1,896   | 654      | 7,292/65,324 (11.2)       | 2,250/27,277 (9.3)        | 9,842/92,601 <b>(10.6)</b>                                  |
| Any bleeding                                       | 3                                                          | 48      | 1,558   | 786      | 51/65,324 (0.1)           | 2,344/27,277 (8.6)        | 2,395/92,601 <b>(2.6)</b>                                   |
| Delirium                                           | 0                                                          | 0       | 645     | 138      | 0/65,324 (0.0)            | 783/27,277 (2.9)          | 783/92,601 <b>(0.8)</b>                                     |
| Constipation                                       | 0                                                          | 0       | 414     | 80       | 0/65,324 (0.0)            | 494/27,277 (1.8)          | 494/92,601 <b>(0.5)</b>                                     |
| Serotonin syndrome                                 | 487                                                        | 1,633   | 387     | 85       | 2,120/65,324 (3.2)        | 472/27,277 (1.7)          | 2,592/92,601 <b>(2.8)</b>                                   |
| Voiding disorders                                  | 0                                                          | 59      | 133     | 34       | 59/65,324 (0.1)           | 167/27,277 (0.6)          | 226/92,601 <b>(0.2)</b>                                     |
| Sexual dysfunction                                 | 81                                                         | 512     | 130     | 5        | 593/65,324 (0.9)          | 135/27,277 (0.5)          | 728/92,601 <b>(0.8)</b>                                     |
| Cognitive decline                                  | 0                                                          | 11      | 24      | 34       | 11/65,324 (0.0)           | 58/27,277 (0.2)           | 69/92,601 <b>(0.1)</b>                                      |

Appendix

**Table S8:** Potential deprescribing indications (PDIs) (i.e., simultaneous long-term and potential high-risk use) in 2012 and 2019

|                                               | Second quarter<br>2012       | Second quarter<br>2019                                            | Relative risk 2019 vs 2012 (95% CI) |                  |
|-----------------------------------------------|------------------------------|-------------------------------------------------------------------|-------------------------------------|------------------|
|                                               | No. of patients<br>(crude %) | No. of patients (crude %,<br>age-sex standardised <sup>a</sup> %) | Crude                               | Age-sex stand.   |
| <b>PDI among AD users:</b>                    |                              |                                                                   |                                     |                  |
| PDI                                           | 17,465/73,600 (23.7)         | 23,885/92,601 (25.8; <b>26.5</b> )                                | 1.09 (1.07-1.11)                    | 1.11 (1.10-1.13) |
| <b>Sex</b>                                    |                              |                                                                   |                                     |                  |
| Women                                         | 12,375/51,083 (24.2)         | 16,745/62,556 (26.8; <b>27.3</b> )                                | 1.10 (1.08-1.13)                    | 1.13 (1.10-1.15) |
| Men                                           | 5,090/22,517 (22.6)          | 7,140/30,045 (23.8; <b>24.6</b> )                                 | 1.05 (1.02-1.08)                    | 1.09 (1.05-1.13) |
| <b>Age groups (years)</b>                     |                              |                                                                   |                                     |                  |
| 18 - 39                                       | 1,298/14,179 (9.2)           | 1,806/20,831 (8.7; <b>9.1</b> )                                   | 0.95 (0.88-1.01)                    | 1.00 (0.93-1.07) |
| 40 - 64                                       | 7,310/36,965 (19.8)          | 9,382/44,493 (21.1; <b>20.8</b> )                                 | 1.07 (1.04-1.10)                    | 1.05 (1.02-1.08) |
| 65 - 79                                       | 6,296/15,710 (40.1)          | 9,159/19,310 (47.4; <b>47.5</b> )                                 | 1.18 (1.16-1.21)                    | 1.19 (1.16-1.22) |
| ≥80                                           | 2,561/6,746 (38.0)           | 3,538/7,967 (44.4; <b>44.5</b> )                                  | 1.17 (1.12-1.22)                    | 1.17 (1.13-1.22) |
| <b>High-risk use among each AD drug class</b> |                              |                                                                   |                                     |                  |
| SSRI                                          | 10,819/39,791 (27.2)         | 15,165/51,244 (29.6; <b>30.7</b> )                                | 1.09 (1.07-1.11)                    | 1.13 (1.11-1.15) |
| TCA                                           | 6,086/25,198 (24.2)          | 7,066/25,833 (27.4; <b>27.4</b> )                                 | 1.13 (1.10-1.17)                    | 1.14 (1.10-1.17) |
| SNRI                                          | 1,943/5,092 (38.2)           | 3,721/9,470 (39.3; <b>38.9</b> )                                  | 1.03 (0.99-1.07)                    | 1.02 (0.97-1.07) |
| NASSA                                         | 1,805/6,865 (26.3)           | 3,816/13,279 (28.7; <b>28.1</b> )                                 | 1.09 (1.04-1.15)                    | 1.07 (1.01-1.13) |
| MAOI                                          | 34/160 (21.3)                | 34/128 (26.6; <b>27.5</b> )                                       | 1.25 (0.83-1.89)                    | 1.29 (0.88-1.91) |
| Others                                        | 649/2,586 (25.1)             | 812/2,700 (30.1; <b>27.8</b> )                                    | 1.20 (1.10-1.31)                    | 1.11 (1.01-1.22) |
| <b>Deprivation quintile<sup>b</sup></b>       |                              |                                                                   |                                     |                  |
| 1 (most deprived)                             | 3,896/15,599 (25.0)          | 5,360/20,109 (26.7; <b>27.6</b> )                                 | 1.07 (1.03-1.11)                    | 1.10 (1.06-1.15) |
| 2                                             | 3,737/15,120 (24.7)          | 4,984/19,099 (26.1; <b>26.8</b> )                                 | 1.06 (1.02-1.10)                    | 1.09 (1.04-1.13) |
| 3                                             | 3,289/13,594 (24.2)          | 4,343/16,890 (25.7; <b>26.2</b> )                                 | 1.06 (1.02-1.11)                    | 1.08 (1.04-1.13) |
| 4                                             | 3,759/16,065 (23.4)          | 5,042/19,081 (26.4; <b>27.0</b> )                                 | 1.13 (1.09-1.17)                    | 1.15 (1.11-1.20) |
| 5 (least deprived)                            | 2,189/9,856 (22.2)           | 3,058/12,122 (25.2; <b>25.3</b> )                                 | 1.14 (1.08-1.19)                    | 1.14 (1.08-1.20) |
| <b>Residence<sup>b,c</sup></b>                |                              |                                                                   |                                     |                  |
| Large Urban area                              | 4,227/16,470 (25.7)          | 5,467/20,278 (27.0; <b>27.7</b> )                                 | 1.05 (1.01-1.09)                    | 1.08 (1.04-1.12) |
| Urban area                                    | 7,645/32,305 (23.7)          | 10,604/40,939 (25.9; <b>26.7</b> )                                | 1.09 (1.07-1.12)                    | 1.13 (1.10-1.16) |
| Accessible rural area                         | 4,423/18,953 (23.3)          | 5,929/23,187 (25.6; <b>25.8</b> )                                 | 1.10 (1.06-1.13)                    | 1.11 (1.07-1.15) |
| Remote rural area                             | 575/2,506 (22.9)             | 787/2,897 (27.2; <b>27.9</b> )                                    | 1.18 (1.08-1.30)                    | 1.21 (1.10-1.34) |

<sup>a</sup>direct age-sex standardisation to the 2012 population, <sup>b</sup>deprivation and residence missing for 3,366 (4.6%) antidepressant users in 2012 and 5,300 (5.7%) in 2019, <sup>c</sup>Scottish Executive Urban-Rural Classification



**Table S9:** Sensitivity analysis for long-term and potential high-risk antidepressant use in 2012 and 2019

|                                                   | Second quarter<br>2012       | Second quarter<br>2019                                                | Relative risk 2019 vs 2012 (95% CI) |                  |
|---------------------------------------------------|------------------------------|-----------------------------------------------------------------------|-------------------------------------|------------------|
|                                                   | No. of patients<br>(crude %) | No. of patients (crude %, <b>age-sex standardised<sup>a</sup> %</b> ) | Crude                               | Age-sex stand.   |
| <b>Long-term AD use (SA1)</b>                     | 28,134/73,600 (38.2)         | 45,165/92,601 (48.8; <b>49.8</b> )                                    | 1.28 (1.26-1.29)                    | 1.30 (1.29-1.32) |
| Indicator F1:                                     |                              |                                                                       |                                     |                  |
| Co-prescribed ≥1 FRID                             | 11,673/22,456 (52.0)         | 14,026/27,277 (51.4; <b>51.4</b> )                                    | 0.99 (0.97-1.01)                    | 0.99 (0.97-1.01) |
| Co-prescribed ≥2 FRIDs                            | 6,895/22,456 (30.7)          | 7,681/27,277 (28.2; <b>28.1</b> )                                     | 0.92 (0.89-0.94)                    | 0.91 (0.89-0.94) |
| Co-prescribed ≥3 FRIDs                            | 3,210/22,456 (14.3)          | 3,300/27,277 (12.1; <b>12.0</b> )                                     | 0.85 (0.81-0.89)                    | 0.84 (0.80-0.88) |
| <b>Potential high-risk use (SA2)</b>              | 26,799/73,600 (36.4)         | 30,225/92,601 (32.6; <b>33.2</b> )                                    | 0.90 (0.88-0.91)                    | 0.91 (0.90-0.92) |
| Indicator C5:                                     |                              |                                                                       |                                     |                  |
| Co-prescribed ≥1 drug with TdP risk               | 14,970/73,600 (20.3)         | 11,336/92,601 (12.2; <b>12.4</b> )                                    | 0.60 (0.59-0.62)                    | 0.61 (0.60-0.63) |
| Co-prescribed ≥2 drug with TdP risk               | 6,774/73,600 (9.2)           | 4,533/92,601 (4.9; <b>5.0</b> )                                       | 0.53 (0.51-0.55)                    | 0.54 (0.52-0.56) |
| Co-prescribed ≥3 drug with TdP risk               | 2,379/73,600 (3.2)           | 1,446/92,601 (1.6; <b>1.6</b> )                                       | 0.48 (0.45-0.52)                    | 0.49 (0.46-0.53) |
| <b>Potential high-risk use (SA3)</b>              | 23,018/73,600 (31.3)         | 28,021/92,601 (30.3; <b>30.8</b> )                                    | 0.97 (0.95-0.98)                    | 0.99 (0.97-1.00) |
| <b>Potential high-risk use (SA4)</b>              | 7,586/73,600 (10.3)          | 8,668/92,601 (9.4; <b>9.6</b> )                                       | 0.91 (0.88-0.94)                    | 0.93 (0.90-0.96) |
| <b>Potential deprescribing indications (sPDI)</b> | 4,223/73,600 (5.7)           | 5,990/92,601 (6.5; <b>6.7</b> )                                       | 1.13 (1.09-1.17)                    | 1.16 (1.11-1.21) |

<sup>a</sup>direct age-sex standardisation to the 2012 population; **SA1**: Use of antidepressants in each of 8 consecutive quarters (i.e., without grace periods); **SA2**: Proportion of patients triggering ≥1 high-risk use considering co-prescription of antidepressants with two or more fall risk increasing drugs (Indicator F1); **SA3**: Proportion of patients triggering ≥1 high-risk use considering co-prescription with two or more drugs known to increase the risk of torsades des pointes (Indicator C5); **SA4**: Proportion of patients triggering ≥1 high-risk use considering only indicators with the highest consensus ratings (median of 8 or 9 on a 9-point Likert scale) within the expert panel; **sPDI**: Proportion of patients triggering long-term use without grace periods AND triggering ≥1 high-risk use considering only indicators with the highest consensus ratings.
